# Supplementary material for: Efficient enzymatic synthesis of mangiferin glycosides in hydrophilic organic solvents
Source: Royal Society of Chemistry journal article supplement (doi:10.1039/c3ra42648c), 2013-01-01
Supplement: c3ra42648c.pdf [file c3ra42648c.pdf]

## Supplementary Information

# Efficient Enzymatic Synthesis of Mangiferin Glycosides in Hydrophilic Organic Solvents

Xueming Wu, Jianlin Chu, Jingyu Liang and Bingfang He\*

### Analytical Methods

**HPLC Analysis:** HPLC analysis was conducted using a Dionex P680A HPLC system with a Discovery (ODS) column (250×4.6 mm, 5 μm) and a UV detector at 316 nm. Glycosides were separated from their respective aglycones using a linear gradient of methanol/0.1% formic acid (v/v) in H<sub>2</sub>O: 20-60% at 1 mL/min over 20 min.

**LC-HRMS Analysis:** LC-HRMS was performed on a Waters ACQUITY UPLC system equipped with a binary solvent delivery manager and a sample manager, coupled with a Waters Micromass Q-TOF Premier Mass Spectrometer equipped with an electrospray interface (Waters Corporation, Milford, MA).

**NMR Analysis:** <sup>1</sup>H, <sup>13</sup>C and 2D-NMR spectra of glycosides were obtained using a Bruker AV-500 spectrometer (Switzerland), operating at 500 MHz. Samples were dissolved in DMSO-*d*<sub>6</sub> at room temperature with tetramethylsilane (Me<sub>4</sub>Si) as the chemical shift reference.

### SDS-PAGE of β-Fructofuranosidase

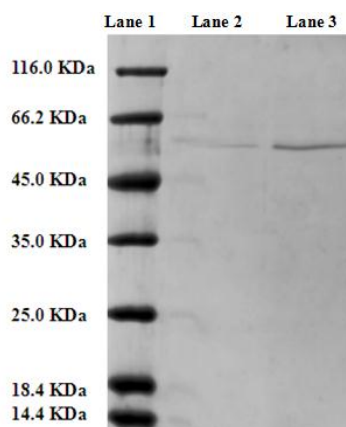

**Figure S1.** SDS-PAGE of culture from *Arthrobacter arilaitensis* NJEM01 and purified β-fructofuranosidase. Lane 1, molecular-mass standards; Lane 2, supernatant of culture (incubated 24h); Lane 3, purified enzyme.

## Specificity of flavonoid substrate for glycosylation

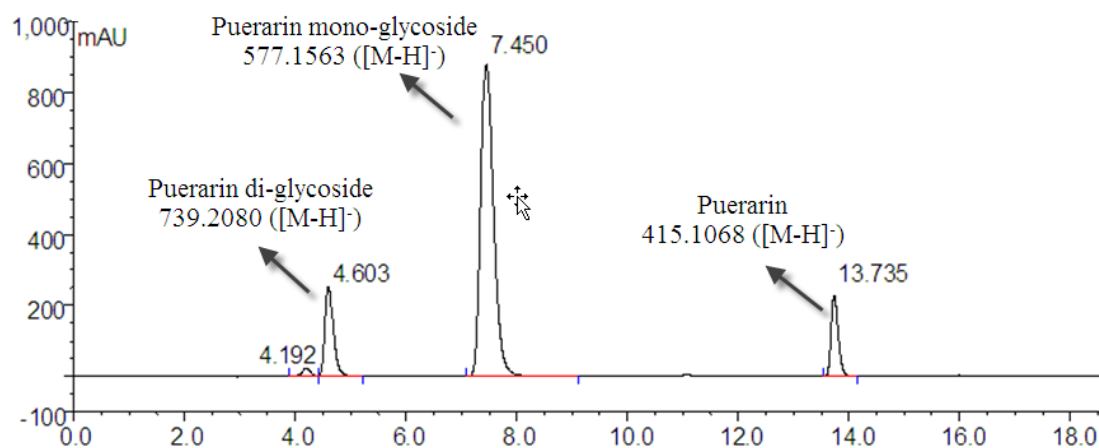

Figure S2. HPLC and MS analysis of puerarin glycosides.

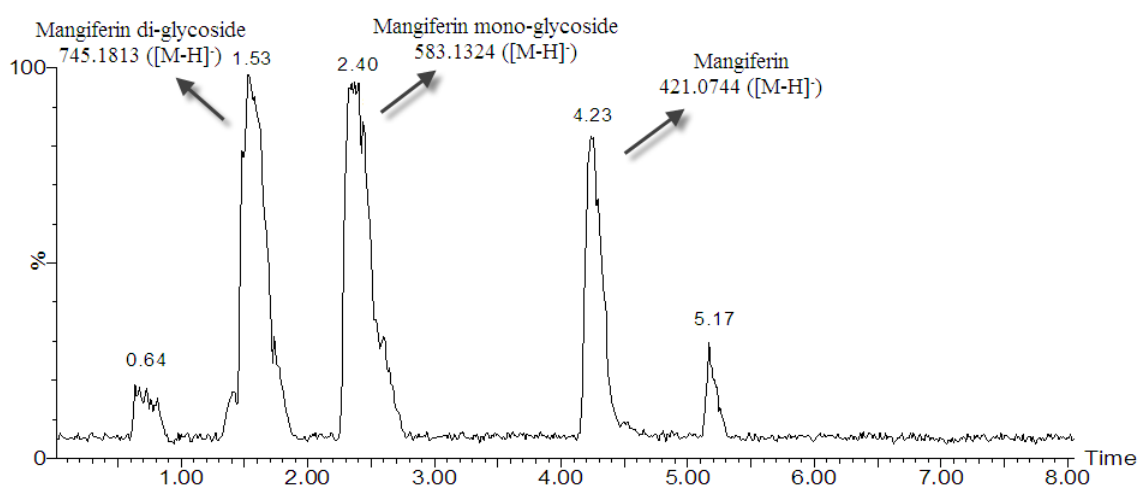

Figure S3. LC-MS analysis of mangiferin glycosides.

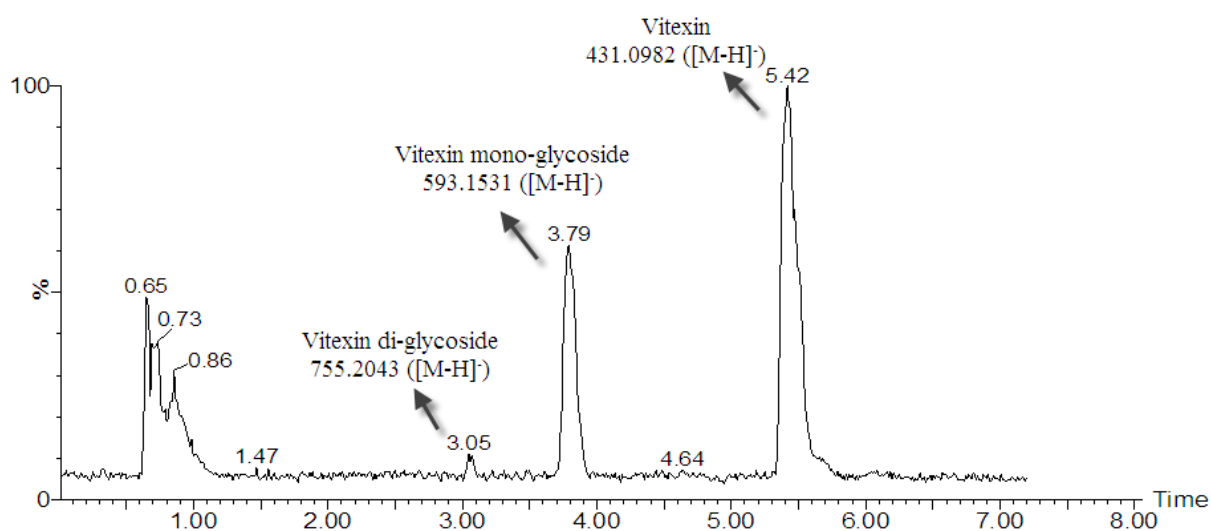

Figure S4. LC-MS analysis of vitexin glycoside

### Identification of Mangiferin Glycosides by $^1\text{H-NMR}$ , $^{13}\text{C-NMR}$ and HR-MS

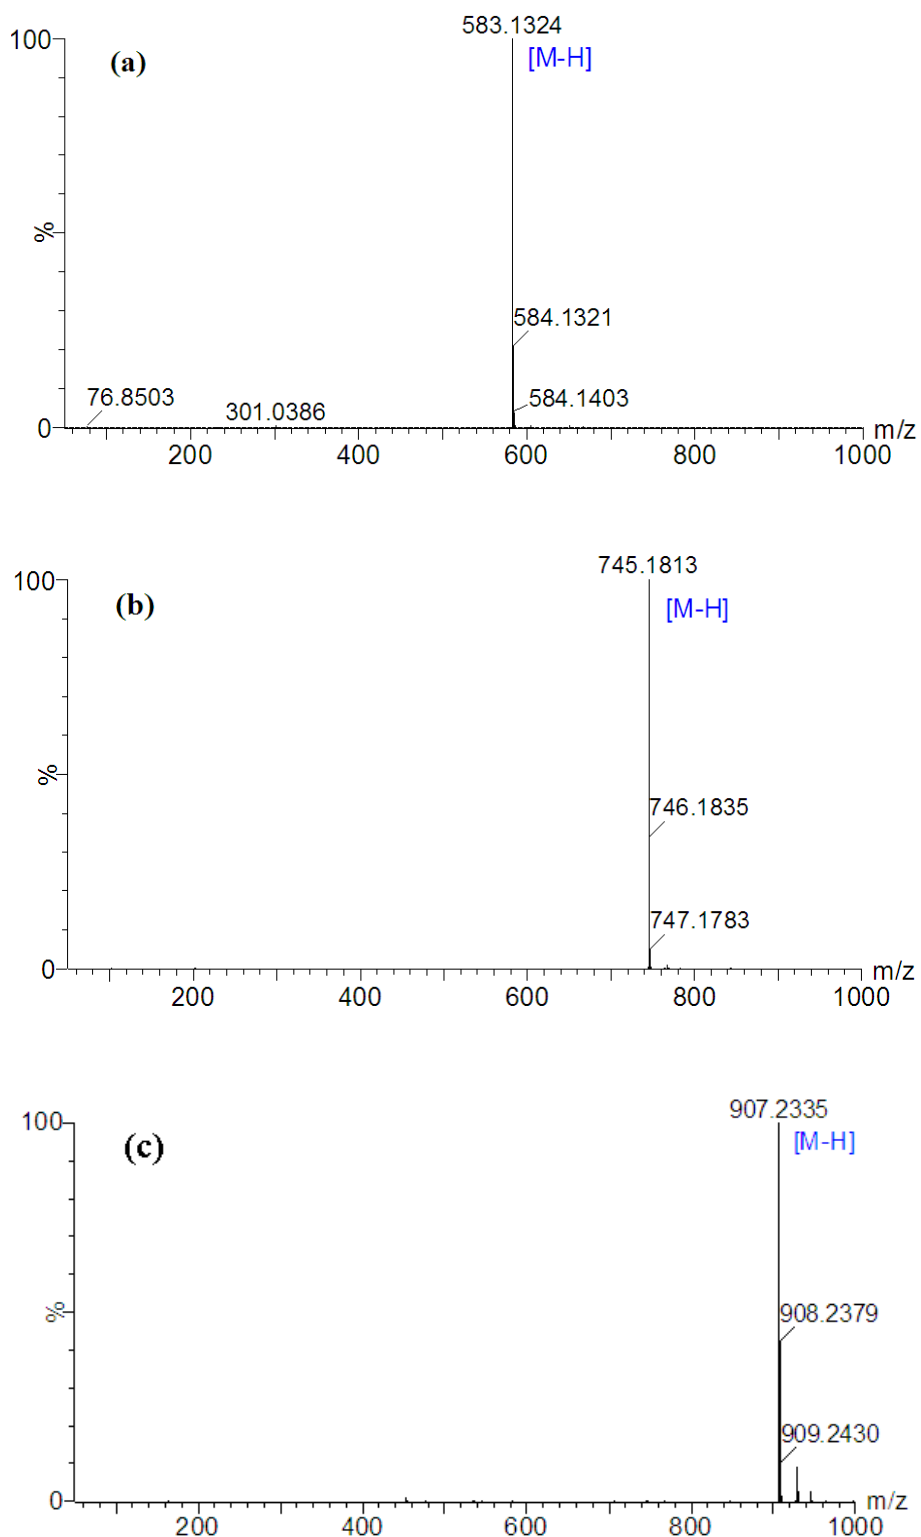

**Figure S5.** HRMS analysis of mangiferin glycosides.

(a)  $\beta$ -D-fructofuranosyl-(2 $\rightarrow$ 6)-mangiferin (M1) (HRMS: 583.1324 ([M-H]<sup>+</sup>) (C<sub>25</sub>H<sub>27</sub>O<sub>16</sub>, calc.583.1299, [M-H]<sup>+</sup>)),

(b)  $\beta$ -D-difructofuranosyl-(2 $\rightarrow$ 6)-mangiferin (M2) (HRMS: 745.1813 ([M-H]<sup>+</sup>) (C<sub>31</sub>H<sub>37</sub>O<sub>21</sub>, calc.745.1827, [M-H]<sup>+</sup>)),

(c)  $\beta$ -D-trifructofuranosyl-(2 $\rightarrow$ 6)-mangiferin (M3) (HRMS: 907.2335 ([M-H]<sup>+</sup>) (C<sub>37</sub>H<sub>47</sub>O<sub>26</sub>, calc.907.2356, [M-H]<sup>+</sup>)).

WXM-5 1H-NMR DMSO 303K AV-500

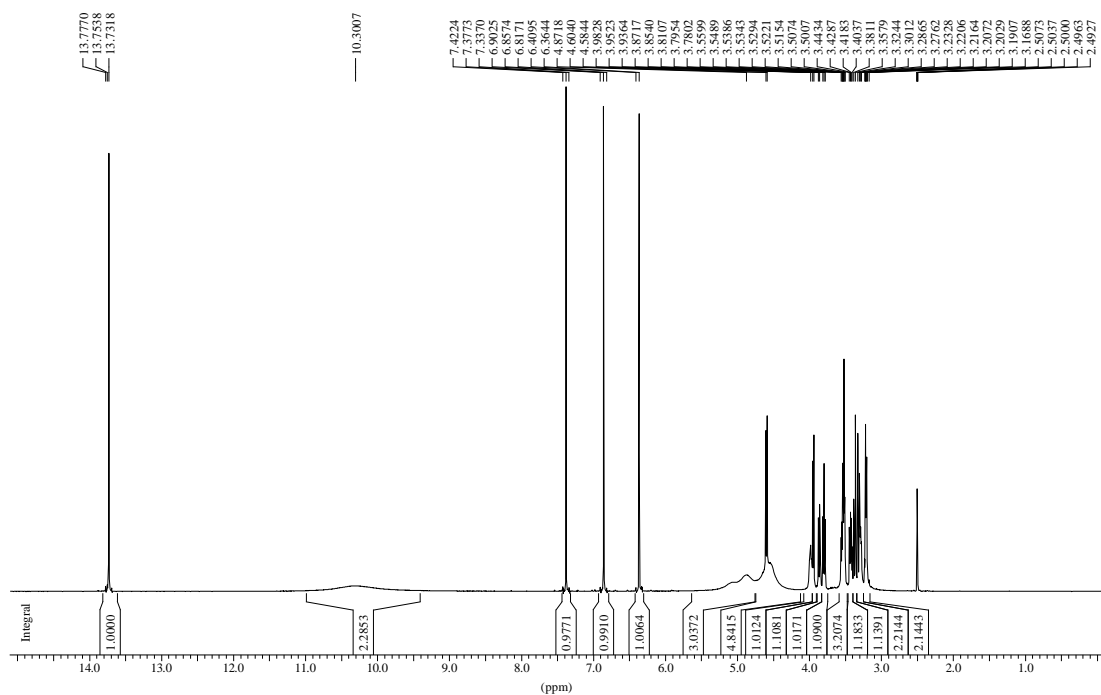

Figure S6. <sup>1</sup>H-NMR spectrum of β-D-fructofuranosyl-(2→6)-mangiferin.

WXM-5 13C-NMR DMSO 303K AV-500

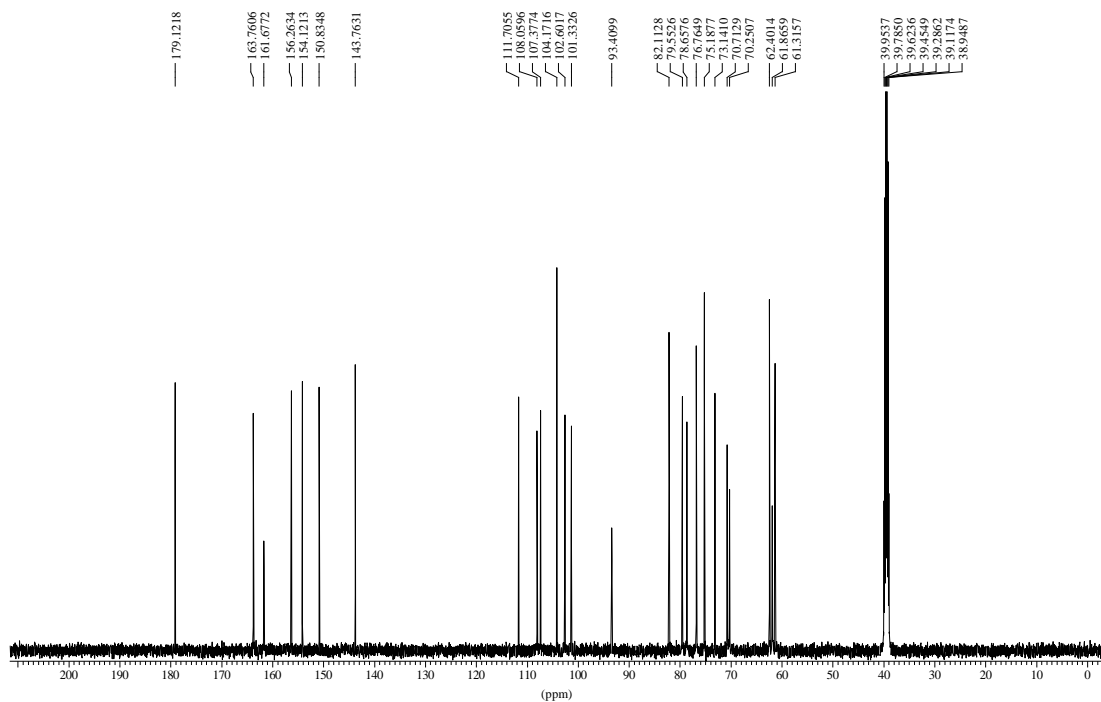

Figure S7. <sup>13</sup>C-NMR spectrum of β-D-fructofuranosyl-(2→6)-mangiferin.

WXM-5 COSY DMSO 303K AV-300

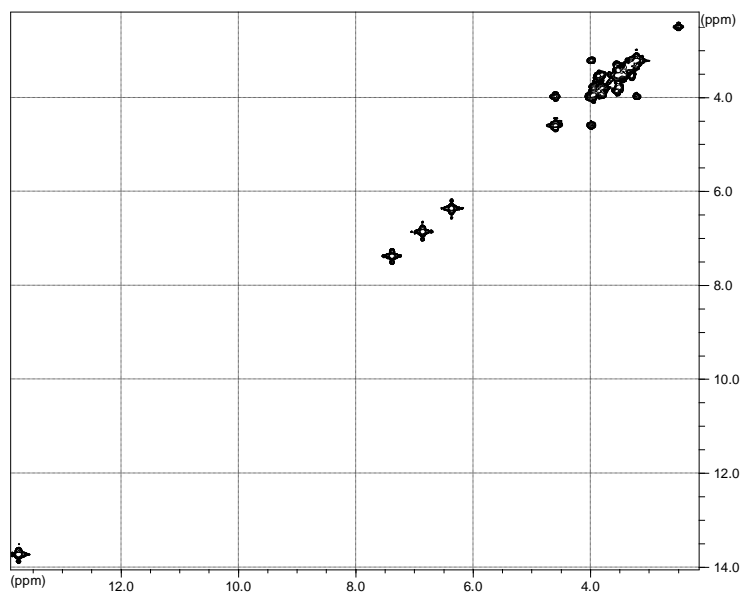

**Figure S8.** 2D  $^1\text{H}$ - $^1\text{H}$  COSY spectrum of  $\beta$ -D-fructofuranosyl-(2 $\rightarrow$ 6)-mangiferin.

WXM-5 HSQC DMSO 303K AV-300

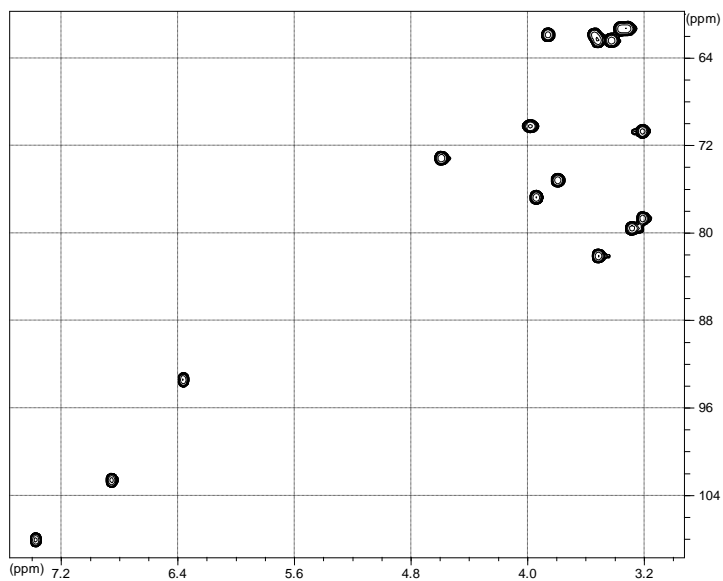

**Figure S9.** 2D  $^1\text{H}$ - $^{13}\text{C}$  HSQC spectrum of  $\beta$ -D-fructofuranosyl-(2 $\rightarrow$ 6)-mangiferin.

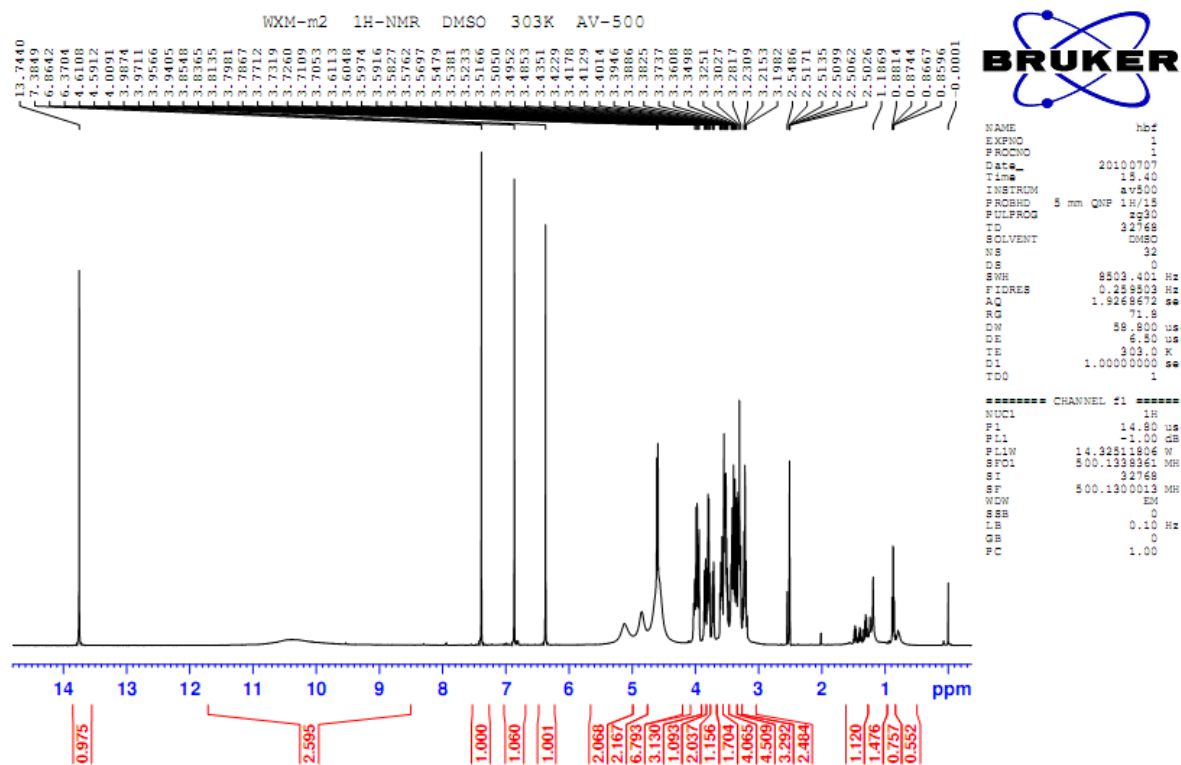

Figure S10. <sup>1</sup>H-NMR spectrum of β-D-difructofuranosyl-(2→6)-mangiferin.

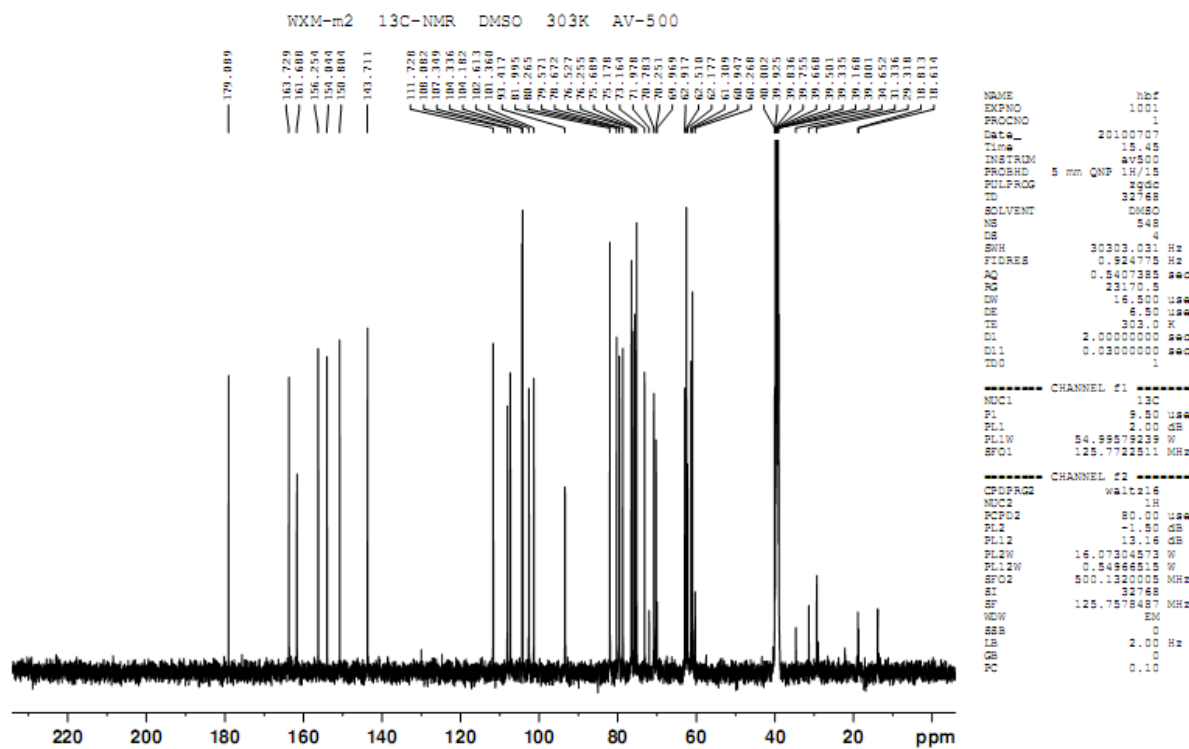

Figure S11. <sup>13</sup>C-NMR spectrum of β-D-difructofuranosyl-(2→6)-mangiferin.

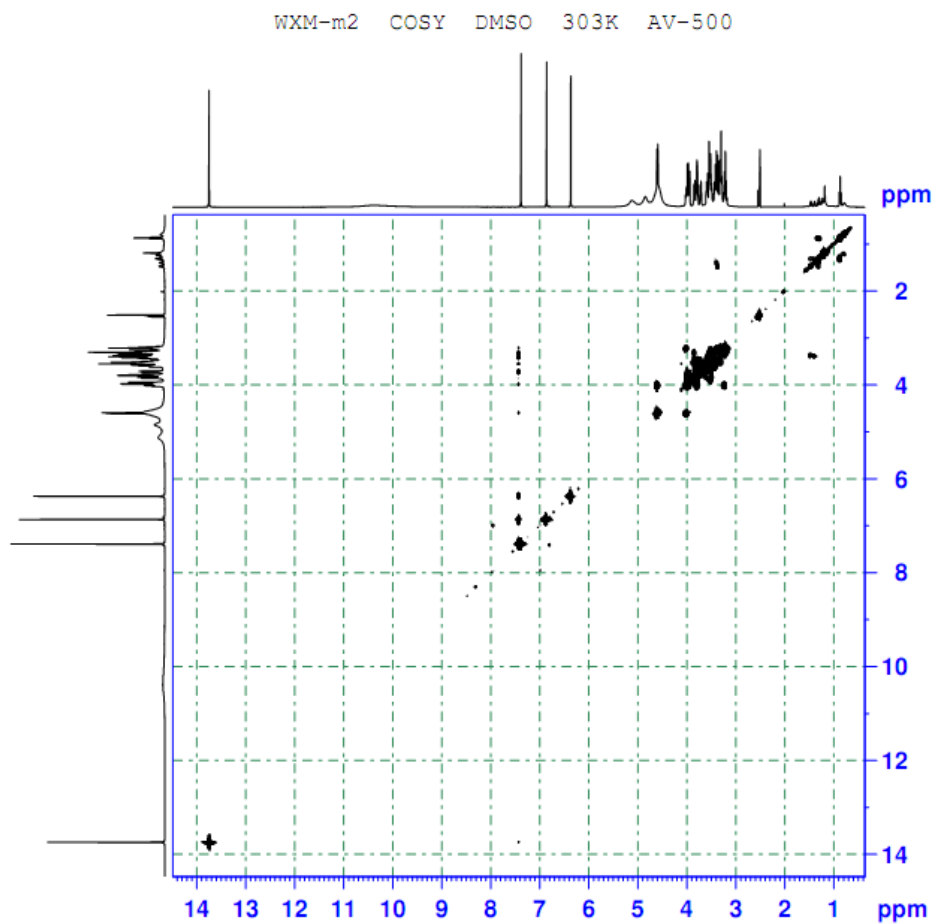

**Figure S12.** 2D  $^1\text{H}$ - $^1\text{H}$  COSY spectrum of  $\beta$ -D-difructofuranosyl-(2 $\rightarrow$ 6)-mangiferin.

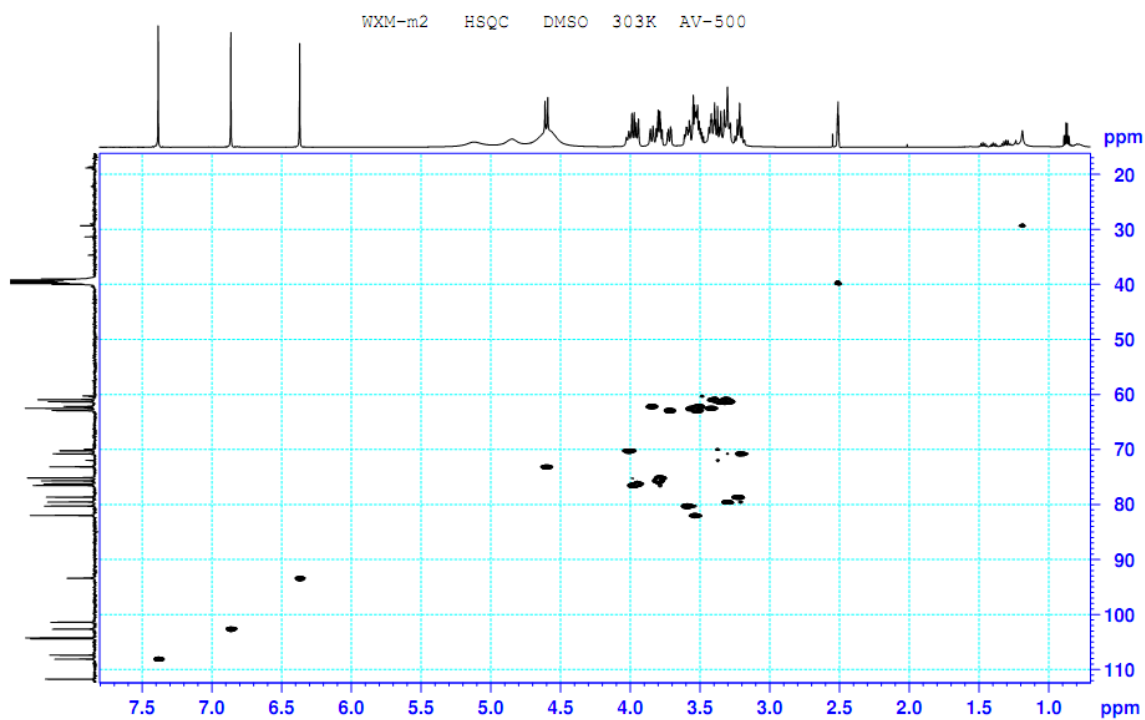

**Figure S13.** 2D  $^1\text{H}$ - $^{13}\text{C}$  HSQC spectrum of  $\beta$ -D-difructofuranosyl-(2 $\rightarrow$ 6)-mangiferin.
